# Supplementary material for: Ursodeoxycholic acid reduces antitumor immunosuppression by inducing CHIP-mediated TGF-β degradation
Source: PubMed Central journal article supplement (PMC9198048; doi:10.1038/s41467-022-31141-6), 2022-06-14
Supplement: 41467_2022_31141_MOESM1_ESM.pdf [file 41467_2022_31141_MOESM1_ESM.pdf]

**Supplementary information**

**Ursodeoxycholic acid reduces antitumor immunosuppression by inducing CHIP-mediated TGF- $\beta$  degradation**

Shen et al.

**Supplementary figures 1 to 11**

**Supplementary tables 1 to 4**

Shen et al.

## Supplementary Figure 1

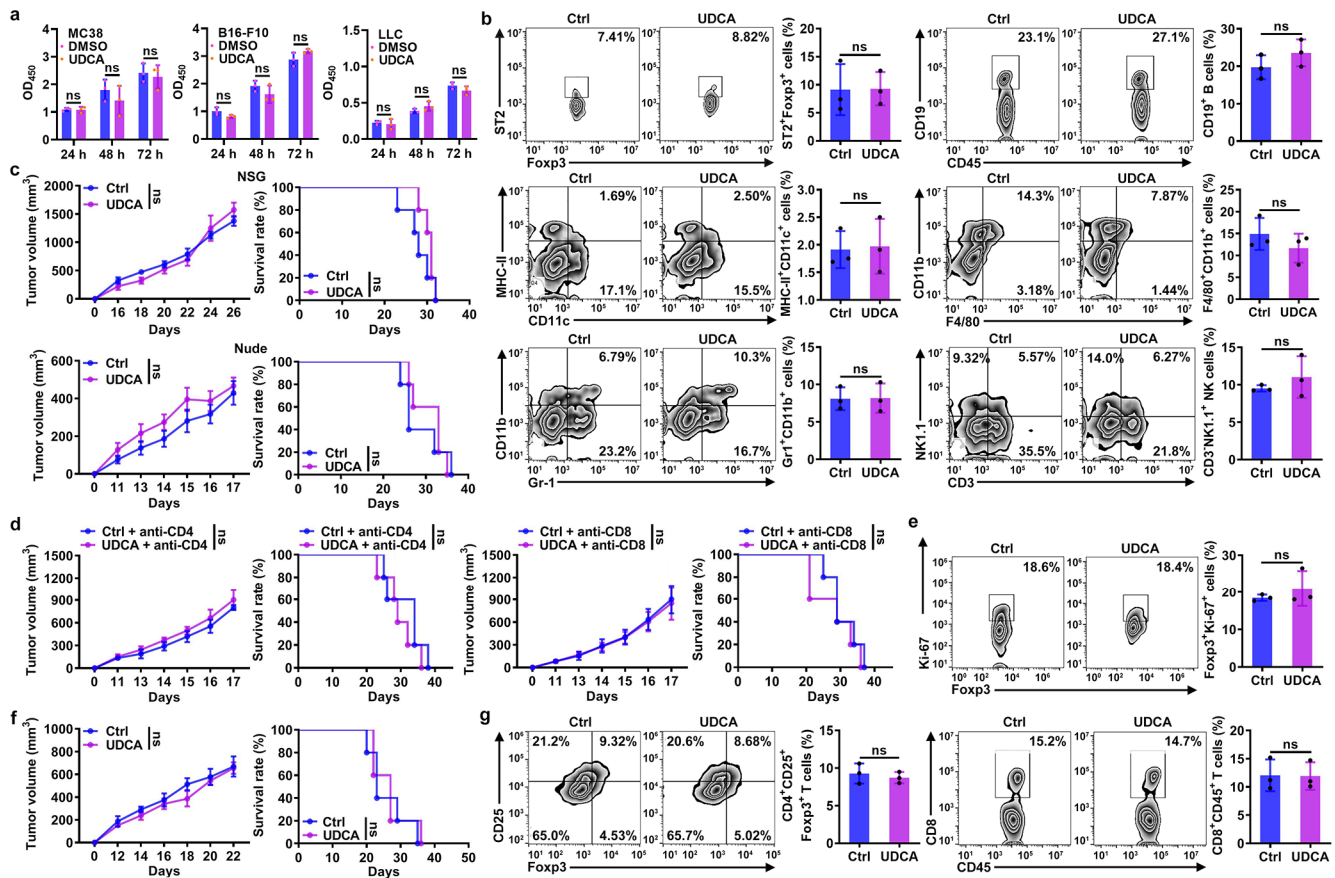

**Supplementary Figure 1** UDCA inhibits Treg cell differentiation in tumor mice. **a** CCK-8 analysis of the viability of MC38, B16-F10, and LLC cells treated with 50  $\mu$ M UDCA for the indicated time. **b** FC analysis of the indicated cell subsets in CD45<sup>+</sup> TILs from LLC tumor-bearing mice that received i.p. injection of 30 mg kg<sup>-1</sup> UDCA every 2 days on day 18. **c** Tumor sizes and mouse survival of LLC tumor-bearing NSG and nude mice that received i.p. injection with 30 mg kg<sup>-1</sup> UDCA every 2 days. **d** Tumor sizes and mouse survival of LLC tumor-bearing mice that received i.p. injection of 30 mg kg<sup>-1</sup> UDCA every 2 days and 120  $\mu$ g anti-CD4-neutralizing antibody (anti-CD4) or 40  $\mu$ g anti-CD8 every 3 days. **e** FC analysis of Ki-67<sup>+</sup> Treg cells in TILs of LLC tumor-bearing mice that received i.p. injection of 30 mg kg<sup>-1</sup> UDCA every 2 days on day 18. **f, g** Tumor sizes and mouse survival (**f**) and FC analysis of CD4<sup>+</sup>CD25<sup>+</sup>Foxp3<sup>+</sup> Treg cells and CD8<sup>+</sup>CD45<sup>+</sup> T cells in TILs on day 18 (**g**) of LLC tumor-bearing *Smad3*<sup>-/-</sup> mice that received i.p. injection with 30 mg kg<sup>-1</sup> UDCA every 2 days. Representative results from

two (**a**) or three (**b-g**) independent experiments are shown ( $n = 3$  in **a, b, e, g**;  $n = 5$  in **c, d, f**). ns, not significant (unpaired two-tailed Student's *t*-test except log-rank test was used for survival rate analysis; mean and s.d.).

## Supplementary Figure 2

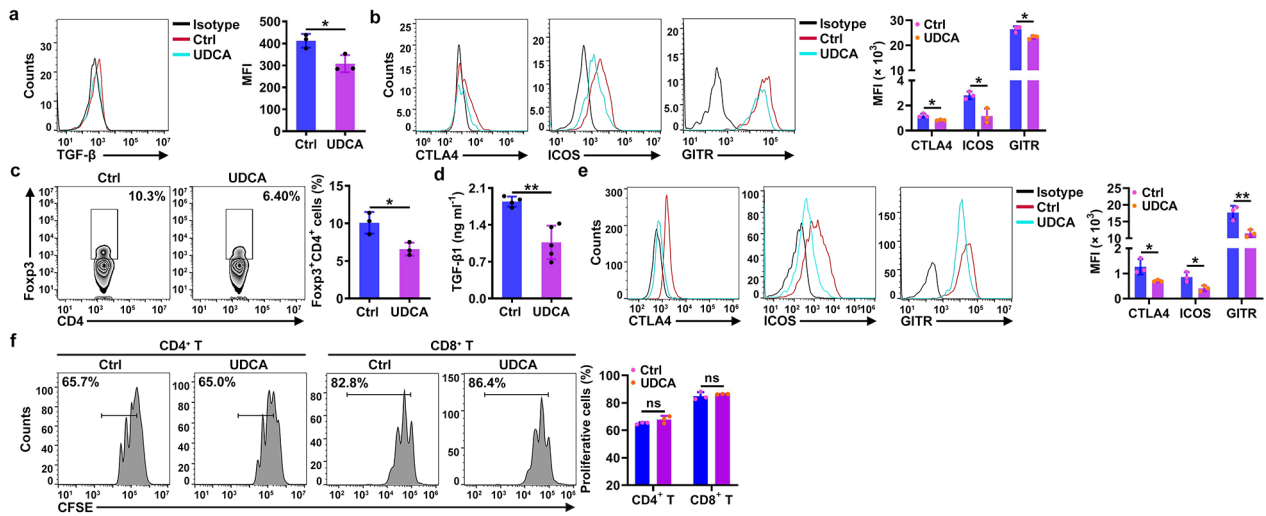

**Supplementary Figure 2** UDCA inhibits Treg cell activation in tumor mice. **a-e** FC analysis of TGF- $\beta$  (**a**), CTLA4, ICOS and GITR (**b**) on Treg cells in TILs, Treg cells in the spleen (**c**) and ELISA analysis of TGF- $\beta$ 1 protein in the supernatants of splenic CD4<sup>+</sup>CD25<sup>+</sup> Treg cells stimulated with anti-CD3 and anti-CD28 for 48 h (**d**) and FC analysis of CTLA4, ICOS and GITR on Treg cells in the spleen (**e**) of LLC tumor-bearing mice received i.p. injection of 30 mg kg<sup>-1</sup> UDCA every 2 days on day 18. **f** FC analysis of the proliferation of CFSE-labeled CD4<sup>+</sup> or CD8<sup>+</sup> T cells cocultured with CD4<sup>+</sup>CD25<sup>+</sup> Treg cells isolated from the spleen of LLC tumor-bearing *Tgfb2<sup>fl/fl</sup>Er-cre* mice that received i.p. injection of 30 mg kg<sup>-1</sup> UDCA every 2 days on day 18 at a 4:1 ratio in anti-CD3 and anti-CD28-coated plates for 5 days. Representative results from three independent experiments are shown ( $n = 3$  in **a-c**, **e**, **f**;  $n = 4$  in **d**). \* $P < 0.05$ ; \*\* $P < 0.01$  and ns, not significant (unpaired two-tailed Student's *t*-test; mean and s.d.). See Source Data file for the exact *P*-values.

## Supplementary Figure 3

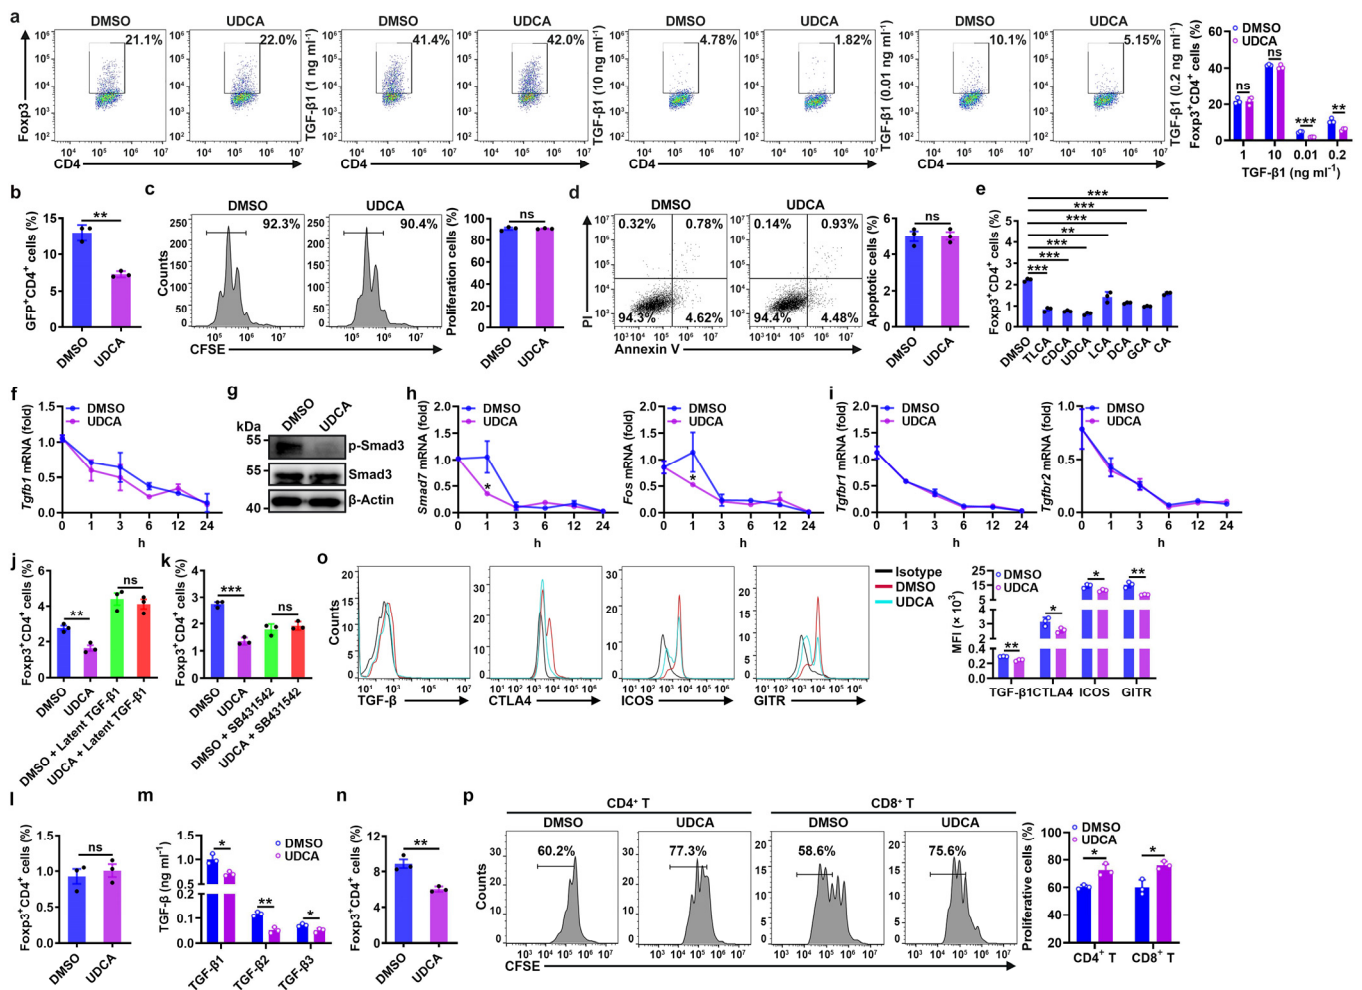

**Supplementary Figure 3** Reduced TGF-β contributes to UDCA-mediated inhibition of Treg cell differentiation and function. **a, b** FC analysis of Foxp3<sup>+</sup>CD4<sup>+</sup> T (**a**) or GFP<sup>+</sup>CD4<sup>+</sup> T (**b**) cells in naïve CD4<sup>+</sup> T cells from wild-type (WT) (**a**) or *Foxp3*<sup>GFP</sup> (**b**) mice stimulated with anti-CD3, anti-CD28, and 50 μM UDCA, as well as the indicated concentration of TGF-β1 (**a**) or 0.2 ng/ml TGF-β1 in serum-free medium (**b**) for 3 days. **c, d** FC analysis of proliferation (**c**) and apoptosis (**d**) of naïve CD4<sup>+</sup> T cells stimulated with anti-CD3, anti-CD28, and 50 μM UDCA for 4 days. **e** FC analysis of Foxp3<sup>+</sup>CD4<sup>+</sup> T cells in naïve CD4<sup>+</sup> T cells stimulated with anti-CD3 and anti-CD28 in the presence of 50 μM taurolithocholic acid (TLCA), chenodeoxycholic acid (CDCA), UDCA, lithocholic acid (LCA), deoxycholic acid (DCA), glycocholic acid (GCA) or cholic acid (CA) for 4 days. **f** Real-time PCR analysis of the *Tgfb1* mRNA in naïve CD4<sup>+</sup> T cells stimulated with anti-CD3, anti-CD28, and 50 μM UDCA for the indicated times. **g-i** IB analysis of

the indicated proteins (**g**) or real-time PCR analysis of the indicated mRNAs (**h, i**) in naïve CD4<sup>+</sup> T cells stimulated with anti-CD3 and anti-CD28 in the presence of 50 µM UDCA for 24 h (**g**) or for the indicated time (**h, i**). **j, k** FC analysis of Foxp3<sup>+</sup>CD4<sup>+</sup> T cells in naïve CD4<sup>+</sup> T cells stimulated with anti-CD3, anti-CD28 and 50 µM UDCA, as well as 2 ng latent TGF-β1 (**j**) or 0.5 µM ALK5 inhibitor (SB431542) (**k**) for 4 days. **l** FC analysis of Foxp3<sup>+</sup>CD4<sup>+</sup> T cells in naïve CD4<sup>+</sup> T cells from *Tgfbr2<sup>fl/fl</sup>Er-cre* mice stimulated with anti-CD3, anti-CD28, and 50 µM UDCA for 4 days. **m**, ELISA analysis of TGF-β1, TGF-β2 and TGF-β3 proteins in LLC-OVA cells treated with 50 µM UDCA for 24 h. **n** FC analysis of Foxp3<sup>+</sup>CD4<sup>+</sup> T cells in naïve CD4<sup>+</sup> T cells from OT-II mice cocultured with LLC-OVA cells with 50 µM UDCA in serum-free medium for 4 days. **o** FC analysis of TGF-β, CTLA-4, ICOS, and GITR on Treg cells induced by supernatant from UDCA-treated LLC-OVA. **p** FC analysis of the proliferation of effector CD4<sup>+</sup> T and CD8<sup>+</sup> T cells cocultured with GFP<sup>+</sup> Treg cells induced by anti-CD3, anti-CD28, and supernatants from LLC-OVA treated with or without 50 µM UDCA at a ratio of 4:1 for 3 days. Representative results from two (**c, d, f, h, i**) or three (**a, b, e, g, j-p**) independent experiments are shown ( $n = 3$  in all statistical groups). \* $P < 0.05$ ; \*\* $P < 0.01$ ; \*\*\* $P < 0.001$  and ns, not significant (unpaired two-tailed Student's *t*-test; mean and s.d.). See Source Data file for the exact *P*-values.

## Supplementary Figure 4

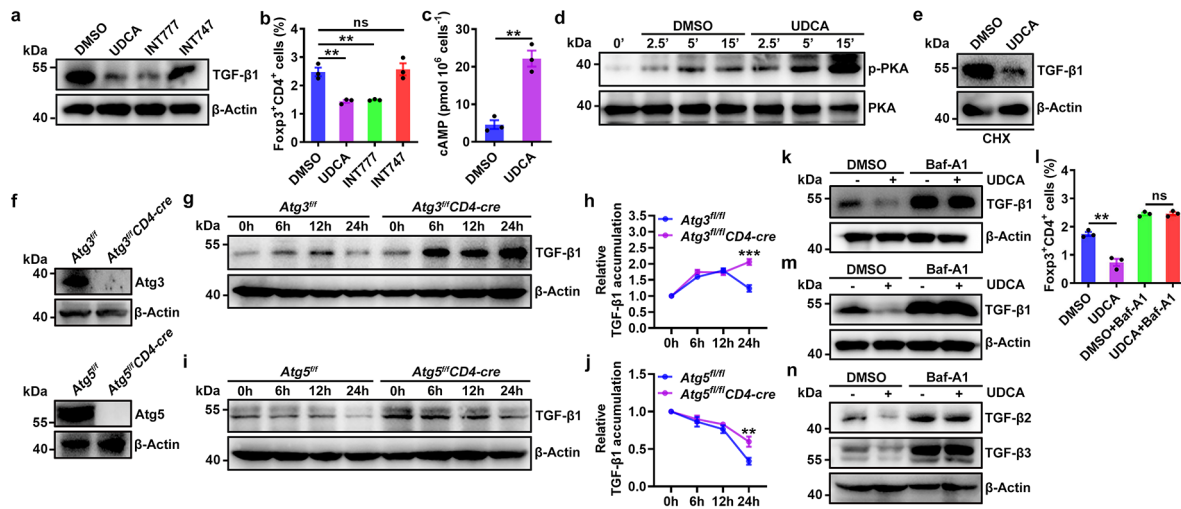

**Supplementary Figure 4** UDCA induces autophagy-dependent degradation of TGF- $\beta$  via the TGR5-cAMP-PKA axis. **a, b** IB analysis of TGF- $\beta$ 1 (**a**) and FC analysis of Foxp3<sup>+</sup>CD4<sup>+</sup> T cells (**b**) in 50  $\mu$ M UDCA-, TGR5 agonist INT777- or FXR agonist INT747-treated naïve CD4<sup>+</sup> T cells stimulated with anti-CD3, anti-CD28 for 24 h (**a**) or 4 days (**b**). **c, d** cAMP levels (**c**) and IB analysis of p-PKA (**d**) in naïve CD4<sup>+</sup> T cells stimulated with anti-CD3, anti-CD28 and 50  $\mu$ M UDCA for 24 h (**c**) or the indicated time (**d**). **e** IB analysis of TGF- $\beta$ 1 in naïve CD4<sup>+</sup> T cells stimulated with anti-CD3, anti-CD28 and 50  $\mu$ M UDCA along with 5  $\mu$ M CHX for 8 h. **f-j** IB analysis of Atg3, Atg5 (**f**) or TGF- $\beta$ 1 (**g, i**) and statistical analysis of TGF- $\beta$ 1 stability (**h, j**) in Atg3- (**f, g, h**)- or Atg5 (**f, i, j**)-deficient naïve CD4<sup>+</sup> T cells without (**f**) or with (**g-j**) anti-CD3 and anti-CD28 stimulation for the indicated times. **k, l** IB analysis of TGF- $\beta$ 1 (**k**) and FC analysis of Foxp3<sup>+</sup>CD4<sup>+</sup> T cells (**l**) in naïve CD4<sup>+</sup> T cells stimulated with anti-CD3, anti-CD28 and 50  $\mu$ M UDCA with or without 1 nM Baf-A1 for 24 h (**k**) or for 4 days (**l**). **m** IB analysis of TGF- $\beta$ 1 in HEK293T cells (overexpressing exogenous TGF- $\beta$ 1) treated with 50  $\mu$ M UDCA with or without 10 nM Baf-A1 for 24 h. **n** IB analysis of TGF- $\beta$ 2 and TGF- $\beta$ 3 in naïve CD4<sup>+</sup> T cells stimulated with anti-CD3, anti-CD28 and 50  $\mu$ M UDCA with or without 1 nM Baf-A1 for 24 h. All representative results from two (**f**) or three (**a-e, g-n**) independent experiments are shown ( $n = 3$  in all statistical groups). \*\* $P < 0.01$ ; \*\*\* $P$

< 0.001 and ns, not significant (unpaired two-tailed Student's *t*-test; mean and s.d.). See Source Data file for the exact *P*-values.



## Supplementary Figure 5

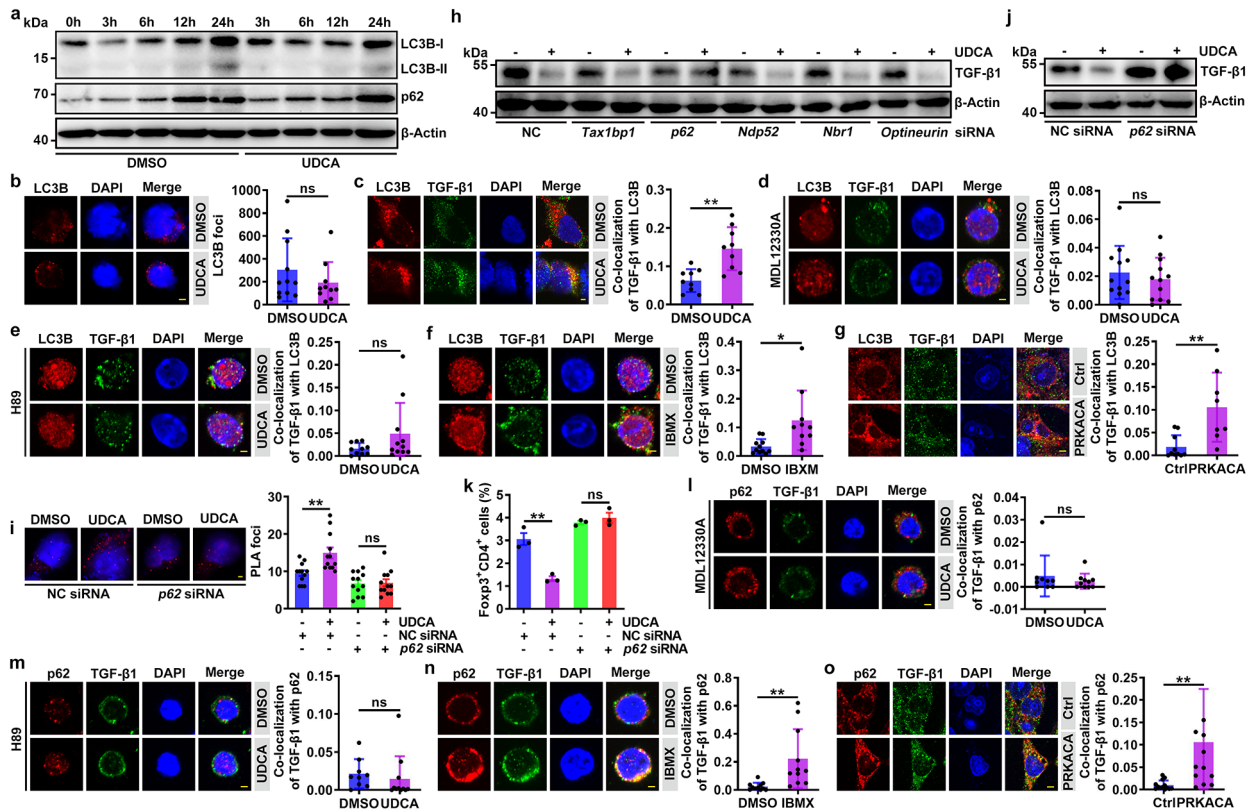

**Supplementary Figure 5** UDCA induces p62-dependent sorting of TGF-β into autophagosomes. **a, b** IB analysis of LC3B and p62 (**a**) or immunofluorescence analysis of LC3B (**b**) in naïve CD4<sup>+</sup> T cells stimulated with anti-CD3, anti-CD28, and 50 μM UDCA for the indicated time (**a**) or for 24 h (**b**). **c-g** Immunofluorescence analysis of LC3B and TGF-β1 HEK293T cells stimulated with 50 μM UDCA (**c**) or in naïve CD4<sup>+</sup> T cells stimulated with anti-CD3, anti-CD28 and 50 μM UDCA, as well as 5 μM MDL12330A (an inhibitor of adenylate cyclase) (**d**) or 2 μM H89 (an inhibitor of PKA) (**e**), or in naïve CD4<sup>+</sup> T cells stimulated with anti-CD3, anti-CD28 and 100 μM IBMX treatment (**f**) and in NIH-3T3 cells with PRKACA overexpression (**g**) for 24 h. **h** IB analysis of TGF-β1 in UDCA-treated NIH-3T3 cells silenced with the indicated mRNA. **i** Confocal microscopy analysis of PLA<sup>+</sup> spots showing the interaction between TGF-β1 and LC3B in HEK2993 cells transfected with NC or *p62* siRNA followed by DMSO or 50 μM UDCA treatment for 24 h. **j, k** IB analysis of TGF-β1 (**j**) and FC analysis of Fcγ3<sup>+</sup>CD4<sup>+</sup> cells (**k**)

in p62-knockdown naïve CD4<sup>+</sup> T cells stimulated with anti-CD3, anti-CD28 and 50 µM UDCA for 24 h (j) and 4 days (k). **l-o** Immunofluorescence analysis of p62 and TGF-β1 in naïve CD4<sup>+</sup> T cells stimulated with anti-CD3, anti-CD28 and 50 µM UDCA, as well as 5 µM MDL12330A (l) or 2 µM H89 (m), in naïve CD4<sup>+</sup> T cells stimulated with anti-CD3, anti-CD28 and 100 µM IBMX treatment (n) and in NIH-3T3 cells with PRKACA overexpression (o) for 24 h. NC, negative control. Scale bar, 2 µm. All representative results from three independent experiments are shown ( $n = 11$  (DMSO) or 10 (UDCA) in **b**;  $n = 9$  in **c**;  $n = 12$  in **d**;  $n = 10$  (DMSO) or 11 (UDCA) in **e**;  $n = 11$  (DMSO) or 10 (IBMX) in **f**;  $n = 10$  (Ctrl) or 8 (PRKACA) in **g**;  $n = 12$  in **i**;  $n = 3$  in **k**;  $n = 9$  (DMSO) or 10 (UDCA) in **l**;  $n = 9$  (DMSO) or 11 (UDCA) in **m**;  $n = 11$  in **n**;  $n = 10$  (Ctrl) or 13 (PRKACA) in **o**). \* $P < 0.05$ ; \*\* $P < 0.01$  and ns, not significant (unpaired two-tailed Student's *t*-test; mean and s.d.). See Source Data file for the exact *P*-values.



cells transfected with vectors expressing the indicated TGF- $\beta$ 1 mutants with Flag tag and vectors expressing Myc-PRKACA and HA-Ub for 24 h assessed after IP with anti-Flag. All representative results from three (**a-c**, **e-j**) independent experiments are shown ( $n = 3$  in **h**). NC, negative control. ns, not significant (unpaired two-tailed Student's *t*-test; mean and s.d.).

## Supplementary Figure 7

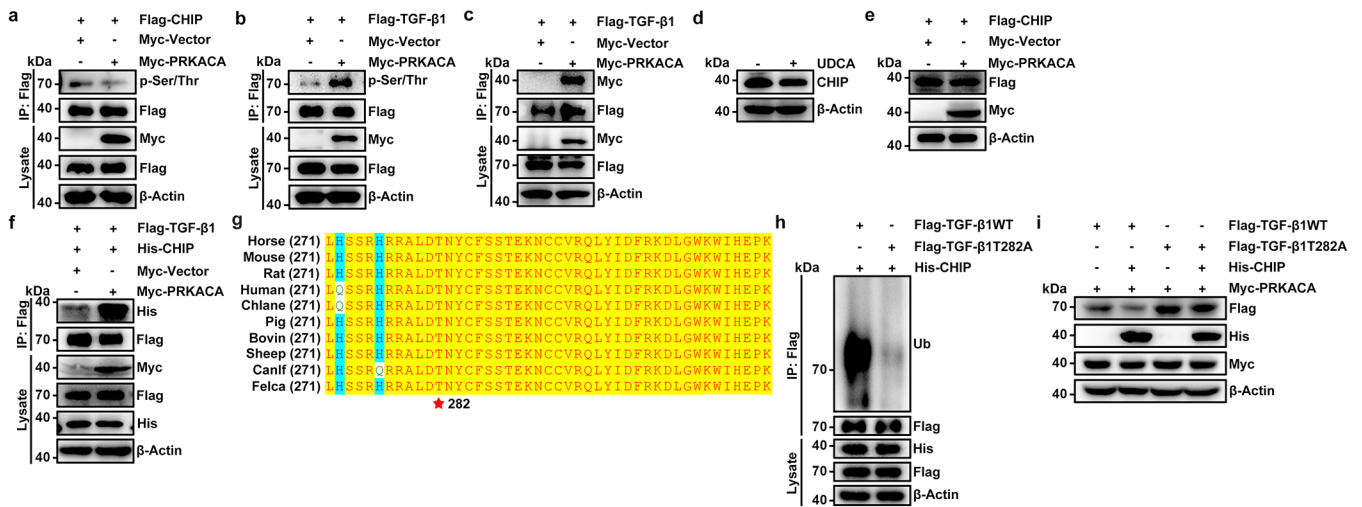

**Supplementary Figure 7** TGF-β1 phosphorylated by PKA has an enhanced ability to bind CHIP. **a, b** IB analysis of p-Ser/Thr of CHIP (**a**) or TGF-β1 (**b**) in lysates of HEK293T cells transfected with vectors expressing Flag-CHIP (**a**) or Flag-TGF-β1 (**b**) as well as vectors expressing Myc-PRKACA for 24 h assessed after IP with anti-Flag. **c** IB analysis of PRKACA in lysates of HEK293T cells transfected with vectors expressing Flag-TGF-β1 and Myc-PRKACA for 24 h assessed after IP with anti-Flag. **d, e** IB analysis of CHIP in HEK293T cells treated with 50 μM UDCA (**d**) or transfected with vectors expressing Flag-CHIP and Myc-PRKACA (**e**) for 24 h. **f** IB analysis of CHIP in lysates of HEK293T cells transfected with vectors expressing Flag-TGF-β1 and His-CHIP, as well as vectors expressing Myc-PRKACA for 24 h assessed after IP with anti-Flag. **g** Alignment of TGF-β1 orthologs. Asterisk, Thr 282. **h** IB analysis of ubiquitinated TGF-β1 in HEK293T cells transfected with vectors expressing His-CHIP and Flag-TGF-β1WT or Flag-TGF-β1T282A assessed after IP with anti-Flag. **i** IB analysis of TGF-β1 in HEK293T cells transfected with vectors expressing His-CHIP, Myc-PRKACA and Flag-TGF-β1WT or Flag-TGF-β1T282A. All representative results from three (**a-f, h, i**) independent experiments are shown.

## Supplementary Figure 8

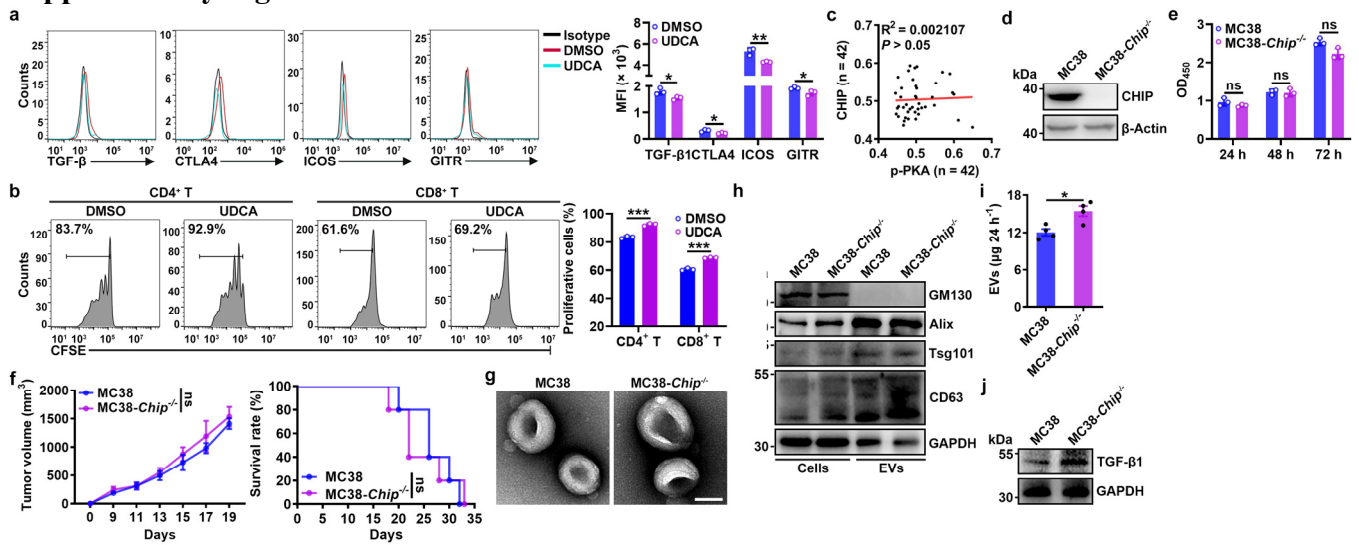

**Supplementary Figure 8** CHIP is negatively associated with tumor progression by reducing TGF- $\beta$ . **a** FC analysis of TGF- $\beta$ 1, CTLA4, ICOS, and GITR of human Treg cells induced by anti-CD3 and anti-CD28 stimulation for 4 days cultured in supernatants of A549 cells prestimulated with 50  $\mu$ M UDCA for 24 h. **b** FC analysis of proliferation of CFSE-labeled CD4<sup>+</sup> or CD8<sup>+</sup> T cells cocultured with CD4<sup>+</sup>CD25<sup>+</sup> Treg cells obtained in **a** at 4:1 ratio in anti-CD3 and anti-CD28-coated plates for 5 days. **c** Correlation between p-PKA and CHIP protein levels. **d** IB detection of CHIP in MC38 and MC38-*Chip*<sup>-/-</sup> cells. **e** CCK-8 analysis of the viability of MC38 and MC38-*Chip*<sup>-/-</sup> cells. **f** Tumor sizes and mouse survival of MC38 and MC38-*Chip*<sup>-/-</sup> tumor-bearing nude mice. **g** Electron microscope detection of morphology of EVs from MC38 and MC38-*Chip*<sup>-/-</sup> cells. Scale bar, 100 nm. **h** IB detection of the indicated proteins in MC38 and MC38-*Chip*<sup>-/-</sup> cells, and in EVs from these cells. **i** BCA measurement of protein amount of EVs from  $1 \times 10^7$  MC38 and MC38-*Chip*<sup>-/-</sup> cells. **j** IB detection of TGF- $\beta$ 1 in EVs from MC38 and MC38-*Chip*<sup>-/-</sup> cells. Representative results from two (**e**, **g**, **h**) or three (**a**, **b**, **d**, **f**, **i**, **j**) independent experiments are shown ( $n = 3$  in **a**, **b**, **e**, **i**;  $n = 5$  in **f**). \* $P < 0.05$ ; \*\* $P < 0.01$ ; \*\*\* $P < 0.001$ ; ns, not significant (unpaired two-tailed Student's *t*-test except log-rank test was used for survival rate analysis; mean and s.d.). See Source Data file for the exact *P*-values.

Shen et al.

## Supplementary Figure 9

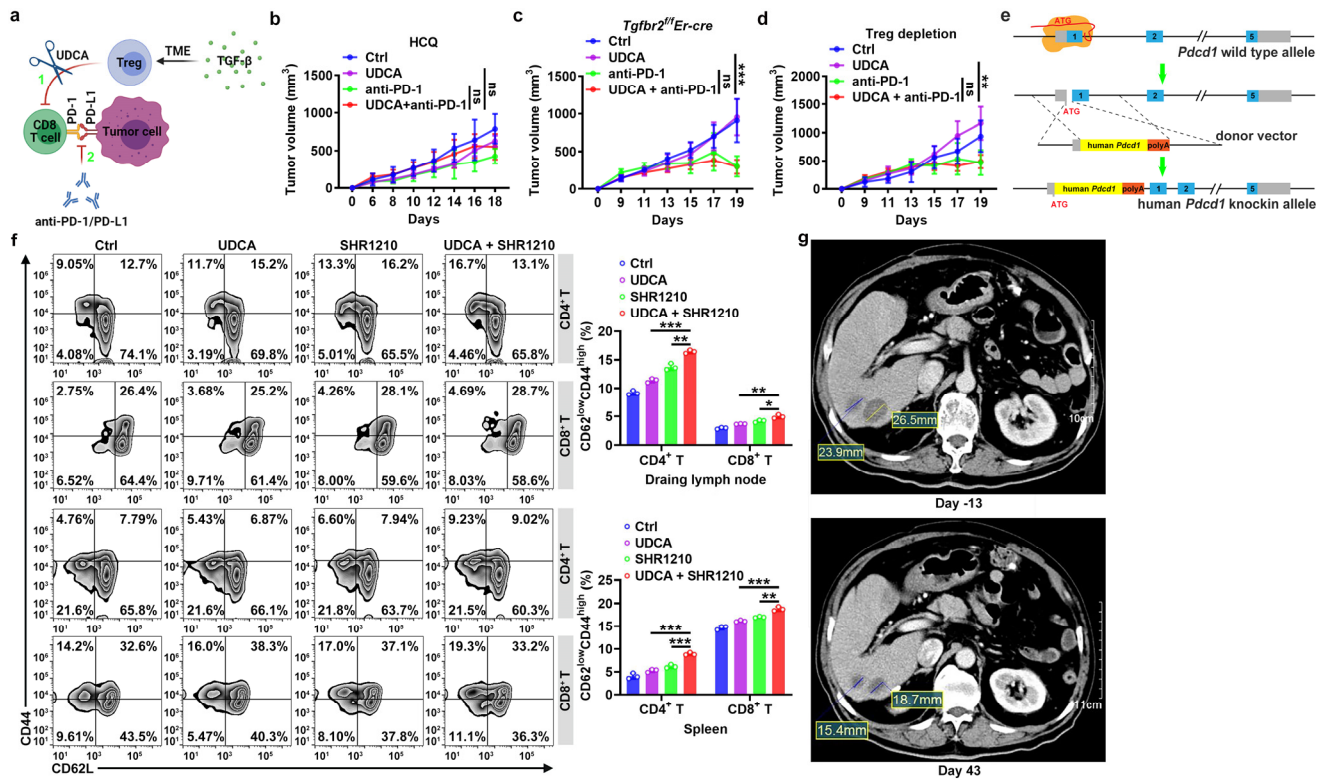

**Supplementary Figure 9** UDCA enhances the antitumor effects of anti-PD-1. **a** Putative benefits in release of tumor immunosuppression by UDCA and anti-PD-1 or anti-PD-L1 combinatorial therapy. TME, tumor microenvironment. **b** Tumor sizes of LLC tumor-bearing mice received oral administration of 30 mg kg<sup>-1</sup> UDCA every other day along with intravenous injection with 50  $\mu$ g anti-PD-1 every 4 days and i.p. injection with 60 mg kg<sup>-1</sup> HCQ every other day. **c** Tumor sizes of LLC tumor-bearing *Tgfb2<sup>fl/fl</sup>Er-cre* mice that received oral administration of 30 mg kg<sup>-1</sup> UDCA every other day along with intravenous injection with 50  $\mu$ g anti-PD-1 every 4 days. **d** Tumor sizes of LLC tumor-bearing mice received oral administration of 30 mg kg<sup>-1</sup> UDCA every other day along with intravenous injection with 50  $\mu$ g anti-PD-1 every 4 days and i.p. injection with 100  $\mu$ g anti-CD25 every 3 days. **e** Construction strategy of humanized PD-1 mice. **f** FC analysis on day 33 of memory T cells in draining lymph nodes and spleen of MC38-huPD-L1 tumor-bearing mice received oral administration of 30 mg kg<sup>-1</sup> UDCA every other day along with intravenous injection with 50  $\mu$ g SHR1210 every 4 days. **g** Computed tomography examination on

days -13 and 43 of a pancreatic cancer patient who received anti-PD-1 and UDCA treatment. The day on which the patient received anti-PD-1 treatment was defined as day 0. Representative results from two independent experiments are shown ( $n = 5$  in **b-d**;  $n = 3$  in **f**). \* $P < 0.05$ ; \*\* $P < 0.01$ ; \*\*\* $P < 0.001$  and ns, not significant (unpaired two-tailed Student's  $t$ -test; mean and s.d.). See Source Data file for the exact  $P$ -values.



## Supplementary Figure 10

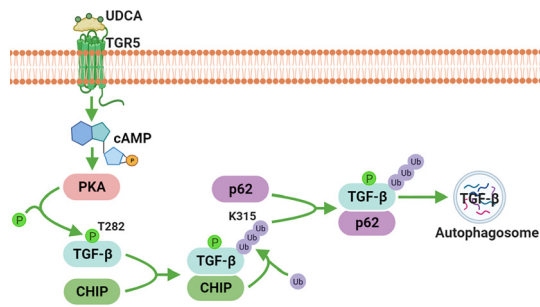

**Supplementary Figure 10** The working model of UDCA-mediated TGF- $\beta$  degradation. UDCA-mediated ligation of TGR5 enhanced intracellular cAMP levels, resulting in activation of PKA. Subsequently, PKA phosphorylated TGF- $\beta$  at the T282 site, leading to the recruitment of CHIP. Then, CHIP ubiquitinated TGF- $\beta$ , initiating autophagy sorting and subsequent degradation of TGF- $\beta$ .

## Supplementary Figure 11

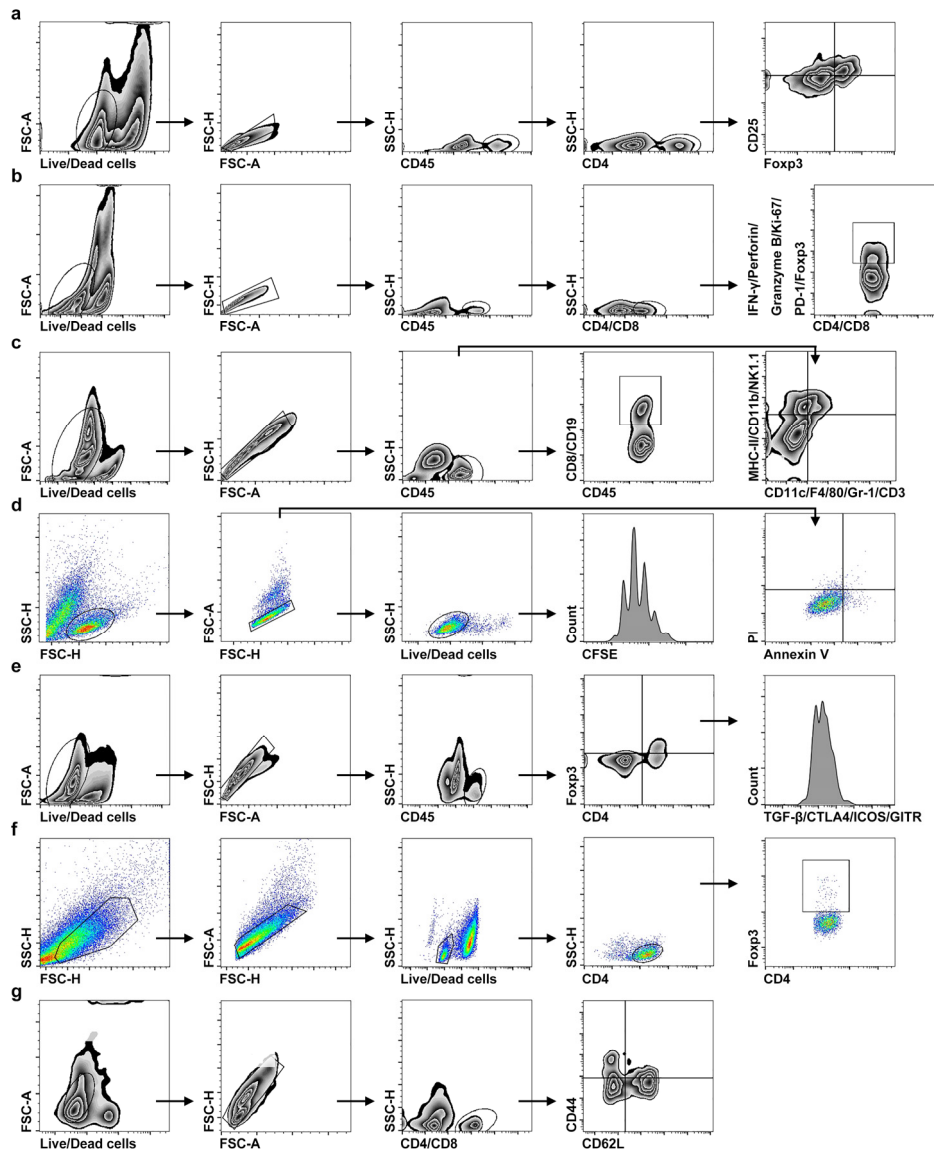

**Supplementary Figure 11** Gating strategies of FC analyses. **(a-f)** Gating strategies of Fig. 1b, 1h and Supplementary Fig. 1g **(a)**, Fig. 1b, 1e, 6p, 7c and Supplementary Fig. 2c **(b)**, Fig. 1b, 1d, 1h, 7c and Supplementary Fig. 1b, 1g **(c)**, Fig. 1i and Supplementary Fig. 2f, 3c, 3d, 3p, 8b **(d)**, Supplementary Fig. 2a, 2b, 2e, 3o, 8a **(e)**, Fig. 2a, 2c, 2e, 2i, 3b, 3e, 3f, 3i, 3j, 3r, 3s, 4d, 5i, 6a, 6c, and Supplementary Fig. 3a, 3b, 3e, 3j, 3k, 3l, 3n, 4b, 4l, 5k **(f)**, Fig. 7d, and Supplementary Fig. 9f **(g)**.

**Supplementary Table 1: Basic information of NSCLC patients.**

| <b>Characteristics</b>         | <b>NSCLC patients</b> |
|--------------------------------|-----------------------|
| <b>Number</b>                  | <b>48</b>             |
| <b>Age (years)</b>             |                       |
| <b>≤ 30</b>                    | <b>0</b>              |
| <b>30-50</b>                   | <b>7</b>              |
| <b>≥ 50</b>                    | <b>41</b>             |
| <b>Gender</b>                  |                       |
| <b>Male</b>                    | <b>29</b>             |
| <b>Female</b>                  | <b>19</b>             |
| <b>Pathological types</b>      |                       |
| <b>Adenocarcinoma</b>          | <b>27</b>             |
| <b>Squamous cell carcinoma</b> | <b>21</b>             |
| <b>clinical Stage</b>          |                       |
| <b>I</b>                       | <b>10</b>             |
| <b>II</b>                      | <b>13</b>             |
| <b>III</b>                     | <b>22</b>             |
| <b>IV</b>                      | <b>3</b>              |

**Supplementary Table 2: Information of patients with ICI treatment.**

| No.                | A  | G | PT    | S    | D-ICI   | N-ICI          | T-ICI | D-US    | D-UE    |
|--------------------|----|---|-------|------|---------|----------------|-------|---------|---------|
| <b>Lung cancer</b> |    |   |       |      |         |                |       |         |         |
| 1                  | 52 | F | AC    | IV   | 2016/1  | Nivolumab      | PD-1  | 2016/3  | 2016/5  |
| 2                  | 54 | F | SCC   | IV   | 2018/6  | Nivolumab      | PD-1  | 2018/10 | 2018/11 |
| 3                  | 54 | M | SCC   | IV   | 2019/11 | Sintilimab     | PD-1  | 2019/10 | 2019/10 |
| 4                  | 60 | F | AC    | IV   | 2019/10 | Atezolizumab   | PD-L1 | 2019/10 | 2019/10 |
| 5                  | 63 | M | AC    | IV   | 2019/6  | Tislelizumab   | PD-1  | 2019/10 | 2019/10 |
| 6                  | 56 | M | SCC   | IV   | 2019/8  | Camrelizumab   | PD-1  | 2019/7  | 2019/8  |
| 7                  | 69 | M | SCC   | IV   | 2017/10 | Nivolumab      | PD-1  | 2017/10 | 2018/2  |
| 8                  | 66 | F | NSCLC | IV   | 2019/4  | Camrelizumab   | PD-1  |         |         |
| 9                  | 72 | M | AC    | IV   | 2019/5  | Tislelizumab   | PD-1  |         |         |
| 10                 | 60 | F | SCC   | IV   | 2019/5  | Nivolumab      | PD-1  |         |         |
| 11                 | 63 | F | AC    | IIIB | 2019/7  | Atezolizumab   | PD-L1 |         |         |
| 12                 | 58 | M | AC    | IV   | 2017/12 | Durvalumab     | PD-L1 |         |         |
| 13                 | 69 | M | NSCLC | IV   | 2018/11 | Camrelizumab   | PD-1  |         |         |
| 14                 | 63 | M | AC    | IV   | 2018/11 | Camrelizumab   | PD-1  |         |         |
| 15                 | 66 | M | AC    | IV   | 2019/4  | Sintilimab     | PD-1  |         |         |
| 16                 | 62 | M | SCC   | IV   | 2019/4  | Toripalimab    | PD-1  |         |         |
| 17                 | 55 | F | NSCLC | IV   | 2019/2  | Nivolumab      | PD-1  |         |         |
| 18                 | 61 | M | SCC   | IV   | 2018/10 | Nivolumab      | PD-1  |         |         |
| 19                 | 67 | M | SCC   | IV   | 2019/5  | Sintilimab     | PD-1  |         |         |
| 20                 | 56 | F | NSCLC | IV   | 2019/1  | Nivolumab      | PD-1  |         |         |
| 21                 | 62 | M | AC    | IV   | 2018/12 | Nivolumab      | PD-1  |         |         |
| 22                 | 53 | M | AC    | IV   | 2018/4  | Permbrolizumab | PD-1  |         |         |
| 23                 | 33 | M | AC    | IV   | 2019/3  | Permbrolizumab | PD-1  |         |         |
| 24                 | 72 | M | AC    | IV   | 2018/11 | Nivolumab      | PD-1  |         |         |
| 25                 | 70 | F | AC    | IV   | 2018/8  | Permbrolizumab | PD-1  |         |         |
| 26                 | 56 | F | AC    | IV   | 2019/4  | Tislelizumab   | PD-1  |         |         |
| 27                 | 66 | M | AC    | IV   | 2019/3  | Tislelizumab   | PD-1  |         |         |
| 28                 | 74 | F | AC    | IV   | 2019/3  | Sintilimab     | PD-1  |         |         |
| 29                 | 58 | M | SCC   | IV   | 2019/3  | Tislelizumab   | PD-1  |         |         |
| 30                 | 61 | M | SCC   | IV   | 2019/2  | Toripalimab    | PD-1  |         |         |
| 31                 | 72 | F | AC    | IV   | 2019/4  | Permbrolizumab | PD-1  |         |         |
| 32                 | 53 | M | AC    | IV   | 2018/11 | Nivolumab      | PD-1  |         |         |
| 33                 | 63 | M | SCC   | IV   | 2018/2  | Permbrolizumab | PD-1  |         |         |
| 34                 | 54 | M | AC    | IV   | 2018/9  | Nivolumab      | PD-1  |         |         |
| 35                 | 75 | M | SCC   | IV   | 2018/11 | Nivolumab      | PD-1  |         |         |
| 36                 | 61 | M | SCC   | IV   | 2019/3  | Tislelizumab   | PD-1  |         |         |
| 37                 | 62 | M | AC    | IV   | 2019/3  | Durvalumab     | PD-L1 |         |         |

|    |    |   |       |      |         |                |       |  |  |
|----|----|---|-------|------|---------|----------------|-------|--|--|
| 38 | 68 | M | SCC   | IV   | 2018/4  | Durvalumab     | PD-L1 |  |  |
| 39 | 60 | M | AC    | IV   | 2019/3  | Tislelizumab   | PD-1  |  |  |
| 40 | 51 | M | AC    | IV   | 2019/3  | Permbrolizumab | PD-1  |  |  |
| 41 | 58 | M | AC    | IV   | 2018/10 | Tislelizumab   | PD-1  |  |  |
| 42 | 65 | M | SCC   | IV   | 2019/2  | Sintilimab     | PD-1  |  |  |
| 43 | 64 | F | AC    | IV   | 2019/1  | Permbrolizumab | PD-1  |  |  |
| 44 | 72 | M | SCC   | IV   | 2019/1  | Sintilimab     | PD-1  |  |  |
| 45 | 59 | M | SCC   | IIIB | 2019/3  | Toripalimab    | PD-1  |  |  |
| 46 | 64 | F | AC    | IV   | 2018/11 | Durvalumab     | PD-1  |  |  |
| 47 | 55 | F | AC    | IV   | 2018/12 | Tislelizumab   | PD-1  |  |  |
| 48 | 72 | M | SCC   | IV   | 2018/11 | Nivolumab      | PD-1  |  |  |
| 49 | 54 | M | SCC   | IIIB | 2018/11 | Tislelizumab   | PD-1  |  |  |
| 50 | 55 | F | AC    | IV   | 2018/11 | Tislelizumab   | PD-1  |  |  |
| 51 | 56 | M | NSCLC | IV   | 2017/11 | Permbrolizumab | PD-1  |  |  |
| 52 | 79 | M | SCC   | IV   | 2017/5  | Permbrolizumab | PD-1  |  |  |
| 53 | 55 | M | NSCLC | IV   | 2017/1  | Permbrolizumab | PD-1  |  |  |
| 54 | 62 | M | AC    | IV   | 2018/12 | Tislelizumab   | PD-1  |  |  |
| 55 | 60 | M | SCC   | IV   | 2019/1  | Sintilimab     | PD-1  |  |  |
| 56 | 47 | M | AC    | IV   | 2018/10 | Durvalumab     | PD-1  |  |  |
| 57 | 65 | M | NSCLC | IV   | 2018/10 | Nivolumab      | PD-1  |  |  |
| 58 | 69 | M | AC    | IV   | 2018/11 | Permbrolizumab | PD-1  |  |  |
| 59 | 51 | M | AC    | IV   | 2018/11 | Tislelizumab   | PD-1  |  |  |
| 60 | 69 | M | NSCLC | IV   | 2018/11 | Tislelizumab   | PD-1  |  |  |
| 61 | 69 | M | SCC   | IIIB | 2019/1  | Tislelizumab   | PD-1  |  |  |
| 62 | 56 | F | AC    | IV   | 2019/2  | Nivolumab      | PD-1  |  |  |
| 63 | 69 | M | SCC   | IV   | 2019/6  | Sintilimab     | PD-1  |  |  |
| 64 | 67 | M | SCC   | IV   | 2019/5  | Permbrolizumab | PD-1  |  |  |
| 65 | 50 | F | AC    | IIIB | 2019/6  | Toripalimab    | PD-1  |  |  |
| 66 | 60 | M | AC    | IV   | 2019/3  | Toripalimab    | PD-1  |  |  |
| 67 | 51 | F | AC    | IV   | 2019/4  | Toripalimab    | PD-1  |  |  |
| 68 | 73 | M | AC    | IV   | 2019/5  | Sintilimab     | PD-1  |  |  |
| 69 | 69 | M | SCC   | IIIB | 2019/3  | Toripalimab    | PD-1  |  |  |
| 70 | 65 | F | AC    | IV   | 2019/5  | Tislelizumab   | PD-1  |  |  |
| 71 | 68 | M | SCC   | IV   | 2019/5  | Nivolumab      | PD-1  |  |  |
| 72 | 64 | M | NSCLC | IV   | 2019/2  | Atezolizumab   | PD-L1 |  |  |
| 73 | 44 | F | AC    | IV   | 2018/7  | Permbrolizumab | PD-1  |  |  |
| 74 | 74 | M | AC    | IV   | 2018/12 | Camrelizumab   | PD-1  |  |  |
| 75 | 71 | F | AC    | IV   | 2019/4  | Sintilimab     | PD-1  |  |  |
| 76 | 64 | M | SCC   | IIIB | 2019/5  | Permbrolizumab | PD-1  |  |  |
| 77 | 61 | M | SCC   | IV   | 2017/11 | Permbrolizumab | PD-1  |  |  |
| 78 | 37 | F | AC    | IIIB | 2018/12 | Atezolizumab   | PD-L1 |  |  |

|     |    |   |       |      |         |                |       |  |  |
|-----|----|---|-------|------|---------|----------------|-------|--|--|
| 79  | 56 | M | SCC   | IV   | 2019/5  | Nivolumab      | PD-1  |  |  |
| 80  | 66 | M | SCC   | IV   | 2019/7  | Atezolizumab   | PD-L1 |  |  |
| 81  | 70 | M | SCC   | IV   | 2019/7  | Nivolumab      | PD-1  |  |  |
| 82  | 62 | M | AC    | IV   | 2018/12 | Tislelizumab   | PD-1  |  |  |
| 83  | 64 | M | NSCLC | IV   | 2019/4  | Tislelizumab   | PD-1  |  |  |
| 84  | 57 | M | SCC   | IV   | 2019/3  | Sintilimab     | PD-1  |  |  |
| 85  | 55 | M | SCC   | IV   | 2019/4  | Nivolumab      | PD-1  |  |  |
| 86  | 66 | M | SCC   | IV   | 2019/6  | Toripalimab    | PD-1  |  |  |
| 87  | 82 | M | AC    | IV   | 2019/5  | Sintilimab     | PD-1  |  |  |
| 88  | 53 | M | AC    | IV   | 2019/4  | Tislelizumab   | PD-1  |  |  |
| 89  | 57 | M | AC    | IIIB | 2019/6  | Atezolizumab   | PD-L1 |  |  |
| 90  | 55 | M | AC    | IIIB | 2019/6  | Permbrolizumab | PD-1  |  |  |
| 91  | 59 | M | AC    | IV   | 2019/3  | Tislelizumab   | PD-1  |  |  |
| 92  | 67 | M | SCC   | IIIB | 2019/4  | Tislelizumab   | PD-1  |  |  |
| 93  | 68 | M | NSCLC | IV   | 2019/3  | Toripalimab    | PD-1  |  |  |
| 94  | 56 | M | AC    | IV   | 2019/7  | Sintilimab     | PD-1  |  |  |
| 95  | 49 | M | AC    | IV   | 2019/2  | Toripalimab    | PD-1  |  |  |
| 96  | 64 | F | AC    | IV   | 2019/3  | Sintilimab     | PD-1  |  |  |
| 97  | 67 | M | SCC   | IV   | 2019/4  | Toripalimab    | PD-1  |  |  |
| 98  | 45 | M | AC    | IV   | 2019/1  | Tislelizumab   | PD-1  |  |  |
| 99  | 64 | M | SCC   | IV   | 2019/6  | Sintilimab     | PD-1  |  |  |
| 100 | 71 | M | SCC   | IV   | 2019/6  | Sintilimab     | PD-1  |  |  |
| 101 | 56 | M | SCC   | IV   | 2018/4  | Permbrolizumab | PD-1  |  |  |
| 102 | 50 | M | SCC   | IV   | 2016/4  | Nivolumab      | PD-1  |  |  |
| 103 | 61 | M | SCC   | IV   | 2017/9  | Camrelizumab   | PD-1  |  |  |
| 104 | 68 | F | AC    | IV   | 2017/1  | Atezolizumab   | PD-L1 |  |  |
| 105 | 59 | M | AC    | IV   | 2018/2  | Tislelizumab   | PD-1  |  |  |
| 106 | 45 | F | AC    | IV   | 2016/12 | Atezolizumab   | PD-L1 |  |  |
| 107 | 61 | M | NSCLC | IV   | 2018/12 | Permbrolizumab | PD-1  |  |  |
| 108 | 64 | M | NSCLC | IV   | 2018/11 | Permbrolizumab | PD-1  |  |  |
| 109 | 44 | M | AC    | IV   | 2016/11 | Atezolizumab   | PD-L1 |  |  |
| 110 | 67 | M | AC    | IV   | 2018/5  | Tislelizumab   | PD-1  |  |  |
| 111 | 51 | F | AC    | IV   | 2018/7  | Tislelizumab   | PD-1  |  |  |
| 112 | 65 | M | SCC   | IV   | 2018/10 | Nivolumab      | PD-1  |  |  |
| 113 | 55 | M | AC    | IV   | 2018/8  | Nivolumab      | PD-1  |  |  |
| 114 | 56 | M | AC    | IV   | 2018/6  | Nivolumab      | PD-1  |  |  |
| 115 | 60 | M | SCC   | IV   | 2018/9  | Nivolumab      | PD-1  |  |  |
| 116 | 60 | M | AC    | IV   | 2018/10 | Permbrolizumab | PD-1  |  |  |
| 117 | 64 | F | AC    | IIIB | 2018/10 | Tislelizumab   | PD-1  |  |  |
| 118 | 64 | M | AC    | IV   | 2018/7  | Nivolumab      | PD-1  |  |  |
| 119 | 60 | M | NSCLC | IV   | 2018/8  | Nivolumab      | PD-1  |  |  |

|     |    |   |       |      |         |                |       |  |  |
|-----|----|---|-------|------|---------|----------------|-------|--|--|
| 120 | 74 | M | SCC   | IV   | 2016/5  | Nivolumab      | PD-1  |  |  |
| 121 | 63 | F | AC    | IV   | 2016/3  | Nivolumab      | PD-1  |  |  |
| 122 | 60 | M | SCC   | IV   | 2018/11 | Permbrolizumab | PD-1  |  |  |
| 123 | 59 | M | AC    | IV   | 2017/3  | Atezolizumab   | PD-L1 |  |  |
| 124 | 70 | M | AC    | IV   | 2016/9  | Nivolumab      | PD-1  |  |  |
| 125 | 64 | M | AC    | IV   | 2016/5  | Nivolumab      | PD-1  |  |  |
| 126 | 67 | M | SCC   | IV   | 2018/6  | Permbrolizumab | PD-1  |  |  |
| 127 | 63 | M | SCC   | IV   | 2018/9  | Nivolumab      | PD-1  |  |  |
| 128 | 55 | M | SCC   | IV   | 2017/1  | Atezolizumab   | PD-L1 |  |  |
| 129 | 58 | M | AC    | IV   | 2016/12 | Atezolizumab   | PD-L1 |  |  |
| 130 | 47 | M | AC    | IV   | 2018/9  | Sintilimab     | PD-1  |  |  |
| 131 | 59 | M | SCC   | IIIB | 2018/9  | Nivolumab      | PD-1  |  |  |
| 132 | 60 | M | NSCLC | IV   | 2018/10 | Nivolumab      | PD-1  |  |  |
| 133 | 50 | M | AC    | IV   | 2018/4  | Tislelizumab   | PD-1  |  |  |
| 134 | 49 | F | AC    | IV   | 2018/7  | Nivolumab      | PD-1  |  |  |
| 135 | 64 | F | AC    | IV   | 2018/9  | Nivolumab      | PD-1  |  |  |
| 136 | 58 | M | SCC   | IV   | 2016/4  | Nivolumab      | PD-1  |  |  |
| 137 | 63 | M | SCC   | IV   | 2017/4  | Atezolizumab   | PD-L1 |  |  |
| 138 | 74 | M | SCC   | IV   | 2016/9  | Nivolumab      | PD-1  |  |  |
| 139 | 73 | M | AC    | IV   | 2018/10 | Permbrolizumab | PD-1  |  |  |
| 140 | 62 | M | SCC   | IV   | 2017/10 | Camrelizumab   | PD-1  |  |  |
| 141 | 56 | M | SCC   | IV   | 2018/3  | Nivolumab      | PD-1  |  |  |
| 142 | 68 | M | AC    | IV   | 2018/9  | Nivolumab      | PD-1  |  |  |
| 143 | 63 | M | SCC   | IV   | 2018/9  | Nivolumab      | PD-1  |  |  |
| 144 | 58 | F | AC    | IV   | 2017/7  | Camrelizumab   | PD-1  |  |  |
| 145 | 63 | M | SCC   | IV   | 2016/6  | Nivolumab      | PD-1  |  |  |
| 146 | 61 | M | SCC   | IV   | 2017/10 | Camrelizumab   | PD-1  |  |  |
| 147 | 56 | M | AC    | IIIB | 2018/8  | Nivolumab      | PD-1  |  |  |
| 148 | 51 | F | AC    | IV   | 2018/3  | Camrelizumab   | PD-1  |  |  |
| 149 | 58 | M | SCC   | IV   | 2017/11 | Camrelizumab   | PD-1  |  |  |
| 150 | 60 | F | AC    | IV   | 2018/7  | Nivolumab      | PD-1  |  |  |
| 151 | 66 | M | SCC   | IV   | 2018/3  | Tislelizumab   | PD-1  |  |  |
| 152 | 67 | M | AC    | IIIB | 2018/2  | Tislelizumab   | PD-1  |  |  |
| 153 | 59 | F | AC    | IV   | 2018/5  | Tislelizumab   | PD-1  |  |  |
| 154 | 56 | M | SCC   | IV   | 2018/8  | Tislelizumab   | PD-1  |  |  |
| 155 | 58 | F | AC    | IV   | 2018/6  | Tislelizumab   | PD-1  |  |  |
| 156 | 56 | F | AC    | IV   | 2018/5  | Tislelizumab   | PD-1  |  |  |
| 157 | 63 | M | SCC   | IV   | 2017/1  | Atezolizumab   | PD-L1 |  |  |
| 158 | 65 | F | AC    | IV   | 2018/7  | Tislelizumab   | PD-1  |  |  |
| 159 | 65 | F | AC    | IV   | 2018/7  | Tislelizumab   | PD-1  |  |  |
| 160 | 68 | M | AC    | IV   | 2018/7  | Tislelizumab   | PD-1  |  |  |

|     |    |   |       |      |         |                |       |  |  |
|-----|----|---|-------|------|---------|----------------|-------|--|--|
| 161 | 61 | M | SCC   | IV   | 2018/11 | Permbrolizumab | PD-1  |  |  |
| 162 | 36 | F | AC    | IV   | 2017/10 | Camrelizumab   | PD-1  |  |  |
| 163 | 51 | F | AC    | IIIB | 2018/3  | Tislelizumab   | PD-1  |  |  |
| 164 | 71 | F | SCC   | IV   | 2018/6  | Nivolumab      | PD-1  |  |  |
| 165 | 43 | M | SCC   | IIIB | 2017/10 | Camrelizumab   | PD-1  |  |  |
| 166 | 61 | F | AC    | IV   | 2018/3  | Permbrolizumab | PD-1  |  |  |
| 167 | 58 | M | NSCLC | IV   | 2018/9  | Nivolumab      | PD-1  |  |  |
| 168 | 55 | M | AC    | IV   | 2018/11 | Nivolumab      | PD-1  |  |  |
| 169 | 59 | M | SCC   | IV   | 2018/9  | Nivolumab      | PD-1  |  |  |
| 170 | 61 | M | AC    | IV   | 2017/1  | Permbrolizumab | PD-1  |  |  |
| 171 | 51 | F | AC    | IIIB | 2016/5  | Nivolumab      | PD-1  |  |  |
| 172 | 52 | M | AC    | IV   | 2016/11 | Atezolizumab   | PD-L1 |  |  |
| 173 | 73 | M | SCC   | IV   | 2018/5  | Tislelizumab   | PD-1  |  |  |
| 174 | 50 | M | NSCLC | IV   | 2018/8  | Nivolumab      | PD-1  |  |  |
| 175 | 63 | M | AC    | IV   | 2018/7  | Camrelizumab   | PD-1  |  |  |
| 176 | 49 | M | AC    | IV   | 2018/6  | Tislelizumab   | PD-1  |  |  |
| 177 | 70 | F | AC    | IV   | 2016/11 | Atezolizumab   | PD-L1 |  |  |
| 178 | 47 | M | SCC   | IV   | 2017/11 | Sintilimab     | PD-1  |  |  |
| 179 | 63 | M | AC    | IV   | 2016/8  | Nivolumab      | PD-1  |  |  |
| 180 | 62 | M | AC    | IV   | 2016/11 | Atezolizumab   | PD-L1 |  |  |
| 181 | 65 | M | AC    | IV   | 2016/11 | Atezolizumab   | PD-L1 |  |  |
| 182 | 66 | M | SCC   | IIIB | 2018/6  | Camrelizumab   | PD-1  |  |  |
| 183 | 81 | M | NSCLC | IV   | 2018/10 | pembrolizumab  | PD-1  |  |  |
| 184 | 57 | M | SCC   | IIIB | 2018/5  | Tislelizumab   | PD-1  |  |  |
| 185 | 61 | M | AC    | IV   | 2018/3  | Tislelizumab   | PD-1  |  |  |
| 186 | 64 | M | AC    | IV   | 2018/1  | Camrelizumab   | PD-1  |  |  |
| 187 | 69 | M | SCC   | IIIB | 2016/12 | Atezolizumab   | PD-L1 |  |  |
| 188 | 63 | M | AC    | IV   | 2018/7  | Nivolumab      | PD-1  |  |  |
| 189 | 68 | M | SCC   | IV   | 2018/8  | Nivolumab      | PD-1  |  |  |
| 190 | 47 | M | AC    | IV   | 2018/10 | Permbrolizumab | PD-1  |  |  |
| 191 | 51 | M | SCC   | IV   | 2018/10 | Tislelizumab   | PD-1  |  |  |
| 192 | 63 | M | SCC   | IIIB | 2018/8  | Nivolumab      | PD-1  |  |  |
| 193 | 58 | M | SCC   | IV   | 2018/7  | Tislelizumab   | PD-1  |  |  |
| 194 | 44 | M | AC    | IV   | 2018/5  | Tislelizumab   | PD-1  |  |  |
| 195 | 63 | M | AC    | IV   | 2018/1  | Camrelizumab   | PD-1  |  |  |
| 196 | 64 | F | AC    | IV   | 2017/12 | Camrelizumab   | PD-1  |  |  |
| 197 | 63 | M | SCC   | IV   | 2018/2  | Camrelizumab   | PD-1  |  |  |
| 198 | 70 | M | SCC   | IV   | 2018/7  | Nivolumab      | PD-1  |  |  |
| 199 | 53 | M | SCC   | IV   | 2018/2  | Camrelizumab   | PD-1  |  |  |
| 200 | 59 | M | SCC   | IV   | 2018/6  | Tislelizumab   | PD-1  |  |  |
| 201 | 50 | M | SCC   | IV   | 2016/11 | Atezolizumab   | PD-L1 |  |  |



|                          |    |   |     |      |         |                                |       |        |           |
|--------------------------|----|---|-----|------|---------|--------------------------------|-------|--------|-----------|
| 202                      | 61 | M | SCC | IV   | 2016/12 | Atezolizumab                   | PD-L1 |        |           |
| 203                      | 63 | M | SCC | IV   | 2018/3  | Tislelizumab                   | PD-1  |        |           |
| 204                      | 67 | M | SCC | IV   | 2017/1  | Atezolizumab                   | PD-L1 |        |           |
| 205                      | 65 | M | AC  | IV   | 2018/2  | Permbrolizumab                 | PD-1  |        |           |
| 206                      | 54 | M | AC  | IV   | 2018/1  | Tislelizumab                   | PD-1  |        |           |
| 207                      | 54 | F | AC  | IV   | 2017/1  | Atezolizumab                   | PD-L1 |        |           |
| 208                      | 53 | M | SCC | IV   | 2016/9  | Nivolumab                      | PD-1  |        |           |
| 209                      | 64 | F | AC  | IV   | 2016/10 | Atezolizumab                   | PD-L1 |        |           |
| 210                      | 53 | M | AC  | IV   | 2017/8  | Camrelizumab                   | PD-1  |        |           |
| 211                      | 63 | M | SCC | IIIB | 2018/3  | Tislelizumab                   | PD-1  |        |           |
| <b>Pancreatic cancer</b> |    |   |     |      |         |                                |       |        |           |
| 1                        | 65 | M | SCC | IV   | 2021/1  | MV11 (Maiwei, Shanghai, China) | PD-1  | 2019/7 | continued |

**Abbreviations:** A, Age; G, Gender; PT, Pathological types; S, Stage; D-ICI, Date of ICI treatment start; N-ICI, Name of ICI; T-ICI, Targe of ICI, D-US, Date of Ursofalk treatment start; D-UE, Date of Ursofalk treatment end; AC, Adenosquamous carcinoma; SCC, Squamous cell carcinoma; AC, Adenocarcinoma

**Supplementary Table 3: Information of antibodies used in this study.**

| <b>Supplementary Table 3: The antibodies for FC and IB.</b> |               |                   |                       |
|-------------------------------------------------------------|---------------|-------------------|-----------------------|
| <b>Antibodies</b>                                           | <b>Source</b> | <b>Identifier</b> | <b>Dilution ratio</b> |
| <b>fixable viability dye eFluor™ 450</b>                    | ThermoFisher  | 65-0863-14        | 1:500                 |
| <b>fixable viability dye eFluor™ 520</b>                    | ThermoFisher  | 65-0867-14        | 1:500                 |
| <b>PB anti-CD45</b>                                         | BioLegend     | 103125            | 1:500                 |
| <b>PE-cy5 anti-CD19</b>                                     | BioLegend     | 115510            | 1:500                 |
| <b>PE anti-CD4</b>                                          | ThermoFisher  | 12-0041-82        | 1:500                 |
| <b>APC anti-CD8</b>                                         | BioLegend     | 100712            | 1:500                 |
| <b>PE anti-Granzyme B</b>                                   | ThermoFisher  | 12-8898-82        | 1:500                 |
| <b>PE anti-IFN-<math>\gamma</math></b>                      | ThermoFisher  | 12-7311-82        | 1:500                 |
| <b>PE anti-ST2</b>                                          | BioLegend     | 146607            | 1:500                 |
| <b>PE anti-Perforin</b>                                     | BioLegend     | 154405            | 1:500                 |
| <b>APC anti-CD11c</b>                                       | BioLegend     | 117310            | 1:500                 |
| <b>PE anti-MHC II</b>                                       | ThermoFisher  | 12-5321-82        | 1:500                 |
| <b>PE anti-CD11b</b>                                        | ThermoFisher  | 12-0112-83        | 1:500                 |
| <b>APC anti-F4/80</b>                                       | BioLegend     | 123115            | 1:500                 |
| <b>APC anti-CD3</b>                                         | BioLegend     | 100235            | 1:500                 |
| <b>PE anti-NK1.1</b>                                        | BioLegend     | 108707            | 1:500                 |
| <b>APC anti-Foxp3</b>                                       | ThermoFisher  | 17-5773-82        | 1:500                 |
| <b>APC anti-Gr1</b>                                         | ThermoFisher  | 17-5931-82        | 1:500                 |
| <b>PE anti-human/mouse Ki-67</b>                            | BioLegend     | 151209            | 1:500                 |
| <b>PE anti-mouse CD152 (CTLA4)</b>                          | BioLegend     | 106305            | 1:500                 |
| <b>PE anti-mouse CD278 (ICOS)</b>                           | ThermoFisher  | 12-9942-81        | 1:500                 |
| <b>PE anti-human CD152 (CTLA4)</b>                          | BioLegend     | 369603            | 1:500                 |
| <b>PE anti-human CD357 (GITR)</b>                           | ThermoFisher  | 12-5875-41        | 1:500                 |
| <b>PE anti-TGF-1/-2/-3</b>                                  | R&D           | IC1835P           | 1:500                 |
| <b>PE anti-CD25</b>                                         | ThermoFisher  | 12-0251-83        | 1:500                 |
| <b>APC anti-CD44</b>                                        | ThermoFisher  | 17-0441-83        | 1:500                 |
| <b>PE anti-CD62L</b>                                        | ThermoFisher  | 12-0621-82        | 1:500                 |
| <b>FITC anti-CD25</b>                                       | BioLegend     | 101907            | 1:500                 |
| <b>Pacific Blue anti-CD4</b>                                | ThermoFisher  | MCD0428           | 1:500                 |
| <b>PE anti-CD8</b>                                          | ThermoFisher  | 12-0081-85        | 1:500                 |
| <b>APC anti-IFN-<math>\gamma</math></b>                     | ThermoFisher  | 17-7311-82        | 1:500                 |
| <b>APC-cy7 anti-CD4</b>                                     | BioLegend     | 100526            | 1:500                 |
| <b>CellTrace™ CFSE Cell Proliferation Kit</b>               | ThermoFisher  | C34554            | 1:200                 |
| <b>Annexin V-FITC/PI</b>                                    | MultiSciences | 70-AP101-100      | 1:200                 |
| <b>PB anti-CD4</b>                                          | BioLegend     | 100428            | 1:500                 |
| <b>APC-cy7 anti-CD8</b>                                     | BioLegend     | 100713            | 1:500                 |
| <b>PE anti-human CD4</b>                                    | ThermoFisher  | 12-0047-41        | 1:500                 |

|                                        |                |            |        |
|----------------------------------------|----------------|------------|--------|
| <b>FITC anti-human CD4</b>             | ThermoFisher   | 11-0048-42 | 1:500  |
| <b>APC anti-human Foxp3</b>            | ThermoFisher   | 17-4777-42 | 1:500  |
| <b>TGF-<math>\beta</math>1</b>         | Cell Signaling | 3711       | 1:1000 |
| <b>TGF-<math>\beta</math>2</b>         | Abclonal       | A3640      | 1:1000 |
| <b>TGF-<math>\beta</math>3</b>         | Abclonal       | A8460      | 1:1000 |
| <b><math>\beta</math>-Actin</b>        | Cell Signaling | 3700       | 1:1000 |
| <b>p-Smad3</b>                         | Cell Signaling | 9520       | 1:1000 |
| <b>Smad3</b>                           | Cell Signaling | 9523       | 1:1000 |
| <b>p-PKA</b>                           | abcam          | ab75991    | 1:3000 |
| <b>PKA</b>                             | abcam          | ab76238    | 1:3000 |
| <b>LC3B</b>                            | Invitrogen     | MA5-37852  | 1:3000 |
| <b>ATG3</b>                            | Abclonal       | A19594     | 1:1000 |
| <b>ATG5</b>                            | Abclonal       | A0203      | 1:1000 |
| <b>K48-UB</b>                          | Cell Signaling | 12805      | 1:1000 |
| <b>K63-UB</b>                          | Cell Signaling | 12930      | 1:1000 |
| <b>UB</b>                              | Cell Signaling | 3936       | 1:1000 |
| <b>CHIP</b>                            | abcam          | ab228742   | 1:3000 |
| <b>Flag</b>                            | Cell Signaling | 14793      | 1:1000 |
| <b>His</b>                             | Cell Signaling | 12698      | 1:1000 |
| <b>Myc</b>                             | Cell Signaling | 2276       | 1:1000 |
| <b>HA</b>                              | Cell Signaling | 3724       | 1:1000 |
| <b>p-Ser/Thr</b>                       | Cell Signaling | 9631       | 1:1000 |
| <b>GM130</b>                           | Abclonal       | A11408     | 1:1000 |
| <b>Alix</b>                            | Abcam          | ab275377   | 1:3000 |
| <b>Tsg101</b>                          | Abcam          | ab125011   | 1:3000 |
| <b>CD63</b>                            | Abcam          | ab217345   | 1:3000 |
| <b>GAPDH</b>                           | Cell Signaling | 5174       | 1:1000 |
| <b>HRP-conjugated goat anti-mouse</b>  | Cell Signaling | 7076       | 1:1000 |
| <b>HRP-conjugated goat anti-rabbit</b> | Cell Signaling | 7074       | 1:1000 |

**Supplementary Table 4: Information of sequences for real-time primers of PCR and sgRNA.**

| <b>mRNA</b>              | <b>Primers</b>                |
|--------------------------|-------------------------------|
| <i>mActb</i> F           | 5'-CGTTGACATCCGTAAGACC-3'     |
| <i>mActb</i> R           | 5'-AACAGTCCGCCTAGAAGCAC-3'    |
| <i>mFoxp3</i> F          | 5'-CTCGTCTGAAGGCAGAGTCA-3'    |
| <i>mFoxp3</i> R          | 5'-TGGCAGAGAGGTATTGAGGG-3'    |
| <i>mTgfb1</i> F          | 5'-TGATACGCCTGAGTGGCTGTCT-3'  |
| <i>mTgfb1</i> R          | 5'-CACAAAGAGCAGTGAGCGCTGAA-3' |
| <i>mTgfb1</i> F          | 5'-TGCTCCAAACCACAGAGTAGGC-3'  |
| <i>mTgfb1</i> R          | 5'-CCCAGAACACTAAGCCCATTGC-3'  |
| <i>mTgfb2</i> F          | 5'-CCTACTCTGTCTGTGGATGACC-3'  |
| <i>mTgfb2</i> R          | 5'-GACATCCGTCTGCTTGAACGAC-3'  |
| <i>mSmad7</i> F          | 5'-GTCCAGATGCTGTACCTTCCTC-3'  |
| <i>mSmad7</i> R          | 5'-GCGAGTCTTCTCCTCCCAGTAT-3'  |
| <i>mFos</i> F            | 5'-GGGAATGGTGAAGACCGTGTCA-3'  |
| <i>mFos</i> R            | 5'-GCAGCCATCTTATTCCGTTCCC-3'  |
| #1 sgRNA for <i>Chip</i> | 5'-AGTCAGCAAGTGCCTGTTCAGG-3'  |
| #2 sgRNA for <i>Chip</i> | 5'-GGCAGTGTACTACACTAACCGG-3'  |
